# Supplementary material for: A Many-Body Field Theory Approach to Stochastic Models in Population Biology
Source: PLoS One. 2009 Sep 1;4(9):e6855. doi: 10.1371/journal.pone.0006855 (PMC2734401; doi:10.1371/journal.pone.0006855)
Supplement: Box S3 — (0.02 MB DOC) [file pone.0006855.s004.doc]

**Coherent states**

Coherent states, are complex eigenvectors of the annihilation operator: *a*|=|. The state |0 is a special case. For real , they are proportional to a Poisson distribution over all numbers or objects. They are important because they form a (non-orthogonal) basis; and because an inner product with the state | results in a sum over all numbers states which can be used to determine normalizations and expectations of random variables. E.g. the expectation of random variable *X* in a state  is
